# Supplementary material for: Habitat Management of the Endemic and Critical Endangered Montseny Brook Newt (Calotriton arnoldi)
Source: MDPI journal article supplement (doi:10.3390/land11030449), 2022-03-21
Supplement: s1 [file s1]

Archive with 3 entries (3 files):
- Supplementary Material Table S1.pdf
- Supplementary Materials Table S2.pdf
- Supplementary Materials Table S3.pdf
