# Supplementary material for: Habitat Management of the Endemic and Critical Endangered Montseny Brook Newt (Calotriton arnoldi)
Source: MDPI journal article supplement (doi:10.3390/land11030449), 2022-03-21
Supplement: s1 [file s1 › Supplementary Material Table S1.pdf]

Supplementary Materials. Table S1. Actions and objectives of Life Tritó del Montseny Project.

| Group of actions                                                            | Id Action | Accion Name                                                                                                                                                           | Objective                                                                                                                                 |
|-----------------------------------------------------------------------------|-----------|-----------------------------------------------------------------------------------------------------------------------------------------------------------------------|-------------------------------------------------------------------------------------------------------------------------------------------|
| A. Preparatory actions, preparation of management plans and/or action plans | A1        | Management and improvement of the captive breeding programme for the Montseny newt: genetic evaluation                                                                | To ensure genetic conservation of <i>C. arnoldi</i> and expand its geographic distribution                                                |
|                                                                             | A2        | Management and improvement of the Montseny newt captive breeding programme: identification of possible causes of bone tissue abnormalities and study of sperm quality | To ensure genetic conservation of <i>C. arnoldi</i> and expand its geographic distribution                                                |
|                                                                             | A3        | Management and improvement of the captive breeding programme for the Montseny newt: technical development of naturalised aquariums                                    | To ensure genetic conservation of <i>C. arnoldi</i> and expand its geographic distribution                                                |
|                                                                             | A4        | Management and improvement of the captive breeding programme for the Montseny newt: information from Life Triton Montseny to potentially involved private owners      | To increase hydrological quality and ecological flow of streams / To eliminate or minimize the threats that exist in the riparian habitat |
| B. Purchase/lease of land or compensation for use rights                    | B1        | Purchase of land or compensation for use rights, where there are Montseny newt populations with obvious threats                                                       | To increase hydrological quality and ecological flow of streams / To eliminate or minimize the threats that exist in the riparian habitat |
|                                                                             | B2        | Implementation of land stewardship agreements with private owners                                                                                                     | To increase hydrological quality and ecological flow of streams / To eliminate or minimize the threats that exist in the riparian habitat |
| C. Concrete conservation actions                                            | C1        | Environmental planning and legislation: Conservation plan for the Montseny newt                                                                                       | To establish proper legal coverage and to approve a conservation plan                                                                     |
|                                                                             | C2        | Environmental planning and legislation: steps to include the Montseny newt in the Habitats Directive                                                                  | To establish proper legal coverage and to approve a conservation plan                                                                     |
|                                                                             | C3        | Environmental planning and legislation: biodiversity information system and database                                                                                  | To monitor the conservation status and increase scientific and technical knowledge                                                        |

Supplementary Materials. Table S1. Actions and objectives of Life Tritó del Montseny Project.

| Group of actions                 | Id Action | Accion Name                                                                                                        | Objective                                                                                                                                 |
|----------------------------------|-----------|--------------------------------------------------------------------------------------------------------------------|-------------------------------------------------------------------------------------------------------------------------------------------|
| C. Concrete conservation actions | C4        | Remodelling of the water collection and distribution system                                                        | To increase hydrological quality and ecological flow of streams / To eliminate or minimize the threats that exist in the riparian habitat |
|                                  | C5        | Promoting the sustainable and responsible use of water: installation of rainwater and greywater collection systems | To increase hydrological quality and ecological flow of streams / To eliminate or minimize the threats that exist in the riparian habitat |
|                                  | C6        | Promoting the sustainable and responsible use of water: implementing green wastewater filters in isolated houses   | To increase hydrological quality and ecological flow of streams / To eliminate or minimize the threats that exist in the riparian habitat |
|                                  | C7        | Improve riverbank habitat: ecological connectivity in streams through road infrastructures                         | To increase hydrological quality and ecological flow of streams / To eliminate or minimize the threats that exist in the riparian habitat |
|                                  | C8        | Improve riparian habitat: native riparian habitats and good forestry practices                                     | To increase hydrological quality and ecological flow of streams / To eliminate or minimize the threats that exist in the riparian habitat |
|                                  | C9        | Captive breeding and restocking of the Montseny newt: extension of the Torreferrussa breeding center               | To ensure genetic conservation of <i>C.arnoldi</i> and expand its geographic distribution                                                 |
|                                  | C10       | Captive breeding and restocking of the Montseny newt: operation of the Torreferrussa breeding center               | To ensure genetic conservation of <i>C.arnoldi</i> and expand its geographic distribution                                                 |
|                                  | C11       | Captive breeding and restocking of the Montseny newt: expand and improve the breeding center of the Barcelona Zoo  | To ensure genetic conservation of <i>C.arnoldi</i> and expand its geographic distribution                                                 |
|                                  | C12       | Captive breeding and restocking of the Montseny newt: operation of the breeding programme at the Barcelona Zoo     | To ensure genetic conservation of <i>C.arnoldi</i> and expand its geographic distribution                                                 |

Supplementary Materials. Table S1. Actions and objectives of Life Tritó del Montseny Project.

| Group of actions                            | Id Action | Accion Name                                                                                                                           | Objective                                                                                                                                 |
|---------------------------------------------|-----------|---------------------------------------------------------------------------------------------------------------------------------------|-------------------------------------------------------------------------------------------------------------------------------------------|
| C. Concrete conservation actions            | C13       | Captive breeding and restocking of the Montseny newt: extension of the Pont de Suert breeding centre                                  | To ensure genetic conservation of <i>C.arnoldi</i> and expand its geographic distribution                                                 |
|                                             | C14       | Captive breeding and restocking of the Montseny newt: operation of the Pont de Suert breeding centre                                  | To ensure genetic conservation of <i>C.arnoldi</i> and expand its geographic distribution                                                 |
|                                             | C15       | Introduction of the Montseny newt and expansion of its distribution area                                                              | To ensure genetic conservation of <i>C.arnoldi</i> and expand its geographic distribution                                                 |
| D. Monitoring the impact of project actions | D1        | Monitoring of conservation actions: technical follow-up of actions for sustainable and responsible water use and habitat improvements | To increase hydrological quality and ecological flow of streams / To eliminate or minimize the threats that exist in the riparian habitat |
|                                             | D2        | Monitoring of the Montseny newt stocks: natural and reintroduced                                                                      | To monitor the conservation status and increase scientific and technical knowledge                                                        |
|                                             | D3        | Monitoring of Montseny newt populations: monitoring of infectious diseases in amphibians in the Montseny PN-RB                        | To monitor the conservation status and increase scientific and technical knowledge                                                        |
|                                             | D4        | Monitoring of Montseny newt populations: sampling of infectious diseases prior to the release of Montseny newt specimens              | To monitor the conservation status and increase scientific and technical knowledge                                                        |
|                                             | D5        | Monitoring of environmental variables and impact of actions: qualitative and quantitative hydrological monitoring                     | To monitor the conservation status and increase scientific and technical knowledge                                                        |
|                                             | D6        | Monitoring of environmental variables and impact of actions: monitoring of the biological impact of interventions in coastal habitats | To monitor the conservation status and increase scientific and technical knowledge                                                        |

Supplementary Materials. Table S1. Actions and objectives of Life Tritó del Montseny Project.

| Group of actions                                 | Id Action | Accion Name                                                                                                            | Objective                                                                                                                                                           |
|--------------------------------------------------|-----------|------------------------------------------------------------------------------------------------------------------------|---------------------------------------------------------------------------------------------------------------------------------------------------------------------|
|                                                  | D7        | Monitoring of environmental variables and impact of actions: socio-economic impact of the Life Triton Montseny project | To Involve and engage stakeholders in the conservation of riparian habitats, their biodiversity and specifically, of the Montseny brook newt                        |
| E. Public awareness and dissemination of results | E1        | Environmental information at local and visitor level: strategy and media relations                                     | To Involve and engage stakeholders in the conservation of riparian habitats, their biodiversity and specifically, of the Montseny brook newt                        |
|                                                  | E2        | Environmental information at the local and visitor level: elaboration of the corporate image                           | To Involve and engage stakeholders in the conservation of riparian habitats, their biodiversity and specifically, of the Montseny brook newt                        |
|                                                  | E3        | Environmental information at local level and visitors: "Life Tritón Montseny" website                                  | To Involve and engage stakeholders in the conservation of riparian habitats, their biodiversity and specifically, of the Montseny brook newt                        |
|                                                  | E4        | Environmental information at local and visitor level: social networks                                                  | To Involve and engage stakeholders in the conservation of riparian habitats, their biodiversity and specifically, of the Montseny brook newt                        |
|                                                  | E5        | Environmental information at the local level and visitors: promotional material for Life Tritón Montseny               | To Involve and engage stakeholders in the conservation of riparian habitats, their biodiversity and specifically, of the Montseny brook newt                        |
|                                                  | E6        | Environmental information at local level and visitors: networking                                                      | To Involve and engage stakeholders in the conservation of riparian habitats, their biodiversity and specifically, of the Montseny brook newt                        |
|                                                  | E7        | Environmental information at the local level and visitors: Layman's report                                             | To involve and engage the agents of the territory in the conservation of riparian habitats, their biodiversity and in particular the conservation of the Brook newt |

Supplementary Materials. Table S1. Actions and objectives of Life Tritó del Montseny Project.

| Group of actions                                 | Id Action | Accion Name                                                                                                | Objective                                                                                                                                    |
|--------------------------------------------------|-----------|------------------------------------------------------------------------------------------------------------|----------------------------------------------------------------------------------------------------------------------------------------------|
| E. Public awareness and dissemination of results | E8        | Local environmental education: exhibition "The Montseny newt and the riparian habitat"                     | To Involve and engage stakeholders in the conservation of riparian habitats, their biodiversity and specifically, of the Montseny brook newt |
|                                                  | E9        | Local environmental education: education and awareness campaign: documentary film "El Tritón del Montseny" | To Involve and engage stakeholders in the conservation of riparian habitats, their biodiversity and specifically, of the Montseny brook newt |
|                                                  | E10       | Local environmental education: educational programme within the scope of the Montseny PN-RB                | To Involve and engage stakeholders in the conservation of riparian habitats, their biodiversity and specifically, of the Montseny brook newt |
|                                                  | E11       | Local environmental education: Barcelona Zoo educational programme                                         | To Involve and engage stakeholders in the conservation of riparian habitats, their biodiversity and specifically, of the Montseny brook newt |
|                                                  | E12       | Training and awareness-raising programme on good forestry practices in coastal habitats                    | To Involve and engage stakeholders in the conservation of riparian habitats, their biodiversity and specifically, of the Montseny brook newt |
|                                                  | E13       | Technical-scientific conferences on the diffusion of Life Tritó Montseny                                   | To Involve and engage stakeholders in the conservation of riparian habitats, their biodiversity and specifically, of the Montseny brook newt |
| F. Project management                            | F1        | Technical management and coordination of the project                                                       | To ensure that the project meets its administrative and economic objectives within the scheduled timeframe                                   |
|                                                  | F2        | Monitoring of the breeding program                                                                         | To ensure genetic conservation of <i>C.arnoldi</i> and expand its geographic distribution                                                    |
|                                                  | F3        | Technical monitoring of project progress: expert committee                                                 | To monitor the conservation status and increase scientific and technical knowledge                                                           |

Supplementary Materials. Table S1. Actions and objectives of Life Tritó del Montseny Project.

| Group of actions | Id Action | Accion Name                                 | Objective                                                                                                                                               |
|------------------|-----------|---------------------------------------------|---------------------------------------------------------------------------------------------------------------------------------------------------------|
|                  | F4        | Audit of project progress and final results | To verify compliance with national legislation and accounting rules, certify that all expenditure incurred complies with the Common Provisions of LIFE+ |
|                  | F5        | After Life Plan                             | Plan how the actions initiated with the LIFE project will be continued and developed after the end of the project                                       |
