# Supplementary material for: Habitat Management of the Endemic and Critical Endangered Montseny Brook Newt (Calotriton arnoldi)
Source: MDPI journal article supplement (doi:10.3390/land11030449), 2022-03-21
Supplement: s1 [file s1 › Supplementary Materials Table S2.pdf]

Supplementary Materials Table S2. POPAN estimators.

POPAN Tested Models

|                          |  |
|--------------------------|--|
| Phi (t) p (t) pent (t) N |  |
| Phi (.) p (t) pent (t) N |  |
| Phi (t) p (.) pent (t) N |  |
| Phi (t) p (.) pent (.) N |  |

Temporal Intervals

| Encounter | Time (in days) | Date       |
|-----------|----------------|------------|
| T1        | 0              | 18/04/2018 |
| T2        | 21             | 09/05/2018 |
| T3        | 35             | 13/06/2018 |
| T4        | 7              | 20/06/2018 |
| T5        | 7              | 27/06/2018 |
| T6        | 7              | 04/07/2018 |
| T7        | 7              | 11/07/2018 |
| T8        | 7              | 18/07/2018 |
| T9        | 133            | 28/11/2018 |
| T10       | 11             | 09/12/2018 |
| T11       | 10             | 19/12/2018 |
| T12       | 112            | 10/04/2019 |
| T13       | 42             | 22/05/2019 |
| T14       | 14             | 05/06/2019 |
| T15       | 27             | 02/07/2019 |
| T16       | 359            | 25/06/2020 |
| T17       | 6              | 01/07/2020 |
| T18       | 7              | 08/07/2020 |
| T19       | 7              | 15/07/2020 |
| T20       | 83             | 06/10/2020 |

Model Selection

| MODEL                                      | QAIC      | NUMPAR   | DEVIANCE     | M2LOGL    | QBIC      |
|--------------------------------------------|-----------|----------|--------------|-----------|-----------|
| Check Par. Cnt. {Phi (t) p (t) pent (t) N} | 458.7830  | 42.00000 | -154.8803000 | 314.5830  | 509.2416  |
| Check Par. Cnt. {Phi (.) p (t) pent (t) N} | 381.1316  | 23.00000 | -148.3064200 | 321.1569  | 427.7556  |
| {Phi (t) p (.) pent (t) N}                 | 416.3263  | 26.00000 | -123.6107000 | 345.8526  | 466.3556  |
| {Phi (t) p (.) pent (.) N}                 | 8639.5359 | 20.00000 | 8119.8287000 | 8589.2920 | 8681.9866 |

Estimated population size for all study period.

**N\*-hat** = 142.8482; Std = 22.0699; 95% Confidence Interval: Lower = 105.7151 Upper = 193.0245

**Survival ( $\phi$ )**;  $\phi$  = 0.9984; Std = 0.6385E-03; 95% Confidence Interval: Lower = 0.9965; Upper = 0.9993

**Pent** (probability of entering the population between two consecutive time intervals)

The probability of population entry between two consecutive time intervals (Newt Birth + Immigration Estimates) is generally negligible (<0.00001 individuals x time period).
