# Supplementary material for: Habitat Management of the Endemic and Critical Endangered Montseny Brook Newt (Calotriton arnoldi)
Source: MDPI journal article supplement (doi:10.3390/land11030449), 2022-03-21
Supplement: s1 [file s1 › Supplementary Materials Table S3.pdf]

Supplementary Materials Table S3. SWOT (strengths, weaknesses, opportunities and threats).

|                      | Species                                                                                                                                                                                                                        | Habitat                                                                                                                                                                                                                                                                                   | Stakeholders                                                                                                                                                                           | Management                                                                                                                                                                                                                                     |
|----------------------|--------------------------------------------------------------------------------------------------------------------------------------------------------------------------------------------------------------------------------|-------------------------------------------------------------------------------------------------------------------------------------------------------------------------------------------------------------------------------------------------------------------------------------------|----------------------------------------------------------------------------------------------------------------------------------------------------------------------------------------|------------------------------------------------------------------------------------------------------------------------------------------------------------------------------------------------------------------------------------------------|
| <b>Opportunities</b> | <b>Good</b> knowledge of the biology and ecology of the sister species <i>C. asper</i> .                                                                                                                                       | <b>Abundant</b> ecological information.<br><b>Many</b> forest ecology research groups.<br><b>Interdisciplinarity</b> of research.                                                                                                                                                         | <b>Involvement</b> of many administrations or entities.<br><b>Entities</b> and landowners in favour of conservation.                                                                   | <b>Successful</b> ex-situ reproduction of the species.<br><b>Public</b> administration involvement.                                                                                                                                            |
| <b>Threats</b>       | <b>Insufficient</b> knowledge.<br><b>Nocturnal</b> activity.<br><b>Fissural</b> behaviour.<br><b>Fragmented</b> population.<br><b>Low</b> number of individuals.<br><b>Restricted</b> distribution.<br><b>Illegal</b> capture. | <b>Orography.</b> 80% is private property<br><b>High</b> human attendance.<br><b>Traditional</b> resource exploitation.<br><b>Reduced</b> distribution area.<br><b>Allochthonous</b> riparian habitat.<br><b>Overexploitation</b> of hydric resources.<br><b>Poor</b> forestry practices. | <b>Involvement</b> of many administrations or entities.<br><b>Difficult</b> and time-consuming interlocution with private property<br><b>Ignorance</b> of the species and its threats. | <b>Cost</b> of habitat management.<br><b>Land</b> ownership.<br><b>Agreements</b> with landlords.<br>Administrative slowness.<br><b>High</b> cost of actions<br><b>Short</b> duration of the Life project to continue the habitat restoration. |
| <b>Weakness</b>      | <b>Little</b> information is available on the biology of the species.<br><b>Critical</b> status of conservation of the species.                                                                                                | <b>Short</b> duration of the project in relation to the time required to observe the evolution of some actions.                                                                                                                                                                           | <b>Lack</b> of similar previous experiences.                                                                                                                                           | <b>Slowness</b> of administrative procedures to act in the territory.                                                                                                                                                                          |
| <b>Strengths</b>     | <b>Successful</b> creation of new populations.<br><b>Successful</b> ex-situ reproduction of the species.<br><b>Significant</b> improvement in knowledge of the biology of the species.                                         | <b>Restoration</b> of riparian habitats.<br><b>Removal</b> of barrier structures.<br><b>Deep</b> knowledge of the environment and its dynamics.                                                                                                                                           | <b>Multidisciplinary</b> of decisions made.<br><b>Post-Life</b> commitment of the administrations to continue with the management plan of the species.                                 | <b>Writing</b> a management and conservation plan.<br><b>Acquired</b> experience.                                                                                                                                                              |
